# Supplementary material for: The Ecm11-Gmc2 Complex Promotes Synaptonemal Complex Formation through Assembly of Transverse Filaments in Budding Yeast
Source: PubMed Central journal article supplement (PMC3542071; doi:10.1371/journal.pgen.1003194), 2013-01-10
Supplement: pgen.1003194.s007.pdf [file pgen.1003194.s007.pdf]

**Table S1.** Yeast strains

| Strain               | Genotype                                                                                                                                                             |
|----------------------|----------------------------------------------------------------------------------------------------------------------------------------------------------------------|
| TBR2065              | <i>MATa leu2-3, 112 his4-260 ura3-1 ade2-1 thr1-4 trp1-289 lys2</i><br>-----<br><i>MATa leu2-3, 112 his4-260 ura3-1 ade2-1 thr1-4 trp1-289 lys2</i>                  |
| TBR4246              | TBR2065 but homozygous <i>ecm11::KAN</i>                                                                                                                             |
| TBR4327              | TBR2065 but homozygous <i>gmc2::NAT</i>                                                                                                                              |
| TBR309               | TBR2065 but homozygous <i>spo11::ADE2</i>                                                                                                                            |
| TBR5150              | TBR2065 but homozygous <i>spo11::ADE2 ecm11::KAN</i>                                                                                                                 |
| TBR5148              | TBR2065 but homozygous <i>spo11::ADE2 gmc2::NAT</i>                                                                                                                  |
| TBR2288 <sup>a</sup> | <i>MATa leu2-3, 112 his4-260 ura3-1 ade2-1 thr1-4 trp1-289 lys2</i><br>-----<br><i>MATa his4-260 ura3-1 ade2-1 thr1-4 trp1-289 lys2 cup1Δ leu2::CUP1 arg4-8 TRP1</i> |
| TBR4282 <sup>a</sup> | TBR2288 but homozygous <i>ecm11::clonNAT</i>                                                                                                                         |
| TBR4326 <sup>a</sup> | TBR2288 but homozygous <i>gmc2::clonNAT</i>                                                                                                                          |
| TBR4757              | TBR2065 but homozygous <i>ecm11::KAN gmc2::clonNAT</i>                                                                                                               |
| TBR5296              | TBR2065 but homozygous <i>ECM11-13myc-KAN ndt80::LEU2</i>                                                                                                            |
| TBR6014              | TBR2065 but homozygous <i>3myc-GMC2 ndt80::LEU2</i>                                                                                                                  |
| TBR5773              | <i>MATa ho::hisG leu2::hisG ura3(delta Sma-Pst) HIS4::LEU2-(NBam)</i> <i>ECM11-13Myc-KAN</i>                                                                         |

-----  
*MATa ho::hisG leu2::hisG ura3(delta Sma-Pst) his4X::LEU2-(NBam)-URA3 ECM11-13Myc-KAN*

- TBR5850 TBR2065 but homozygous *ECM11-13myc-KAN SMT3-3FLAG-TRP1 ndt80::LEU2*
- TBR4321 TBR2065 but homozygous *ECM11-13myc-KAN*
- TBR5632 TBR2065 but homozygous *ecm11\_K5R-13myc-KAN*
- TBR5634 TBR2065 but homozygous *ecm11\_K101R-13myc-KAN*
- TBR5511 TBR2065 but homozygous *ecm11\_K5R\_K101R-13myc-KAN*
- TBR6085 TBR2065 but homozygous *ECM11-13myc-KAN gmc2::clonNAT ndt80::LEU2*
- TBR5311 TBR2065 but homozygous *ECM11-13myc-KAN spo11::ADE2 ndt80::LEU2*
- TBR6090 TBR2065 but homozygous *ECM11-13myc-KAN zip1::LEU2 ndt80::LEU2*
- TBR6088 TBR2065 but homozygous *ECM11-13myc-KAN zip3::URA3 ndt80::LEU2*
- TBR5848 TBR2065 but homozygous *ECM11-13myc-KAN spo16::NAT ndt80::LEU2*
- TBR5734 TBR2065 but homozygous *ECM11-13myc-KAN zip2::LEU2 ndt80::LEU2*
- TBR5736 TBR2065 but homozygous *ECM11-13myc-KAN zip4::URA3 ndt80::LEU2*
- TBR5495 TBR2065 but homozygous *ECM11-3FLAG-KAN 3myc-GMC2*
- TBR4648 TBR2065 but homozygous *3myc-GMC2*
- TBR5977 TBR2065 but homozygous *ECM11-3FLAG-KAN ZIP3-3myc*

PJ69-4A *MATa trp1-901 leu2-3,112 ura3-52 his3-200 gal4Δ gal8Δ LYS2::GAL1-HIS3 GAL2-ADE2 met2::GAL7-lacZ*

TBR6549 TBR2065 but homozygous *ECM11-3FLAG-KAN 3myc-GMC2 ndt80::LEU2*

TBR6595 TBR2065 but homozygous *ECM11-3FLAG-KAN ndt80::LEU2*

TBR5305 TBR2065 but homozygous *ECM11-13myc-KAN gmc2::clonNAT*

TBR5309 TBR2065 but homozygous *3myc-GMC2 ecm11::KAN*

TBR6570 TBR2065 but homozygous *ECM11-3FLAG-KAN 3myc-GMC2 zip1::LEU2 ndt80::LEU2*

TBR6548 TBR2065 but homozygous *ECM11-3FLAG-KAN ZIP3-3myc zip1::LEU2 ndt80::LEU2*

TBR6070 TBR2065 but homozygous *ECM11-13myc-KAN zip1::LEU2*

TBR6078 TBR2065 but homozygous *ECM11-13myc-KAN zip3::URA3*

TBR5994 TBR2065 but homozygous *ECM11-13myc-KAN zip4::URA3*

TBR7313 TBR2065 but homozygous *ECM11-13myc-KAN zip1::LEU2 zip3::URA3*

TBR7314 TBR2065 but homozygous *ECM11-13myc-KAN zip1::LEU2 zip4::URA3*

TBR6306 TBR2065 but homozygous *ecm11\_K5R 3myc-GMC2*

TBR6304 TBR2065 but homozygous *ecm11\_K101R 3myc-GMC2*

TBR6305 TBR2065 but homozygous *ecm11\_K5R\_K101R 3myc-GMC2*

TBR4637 TBR2065 but homozygous *CTF19-13myc-KAN spo11::ADE2 ndt80::LEU2*

TBR4733 TBR2065 but homozygous *CTF19-13myc-KAN spo11::ADE2 ndt80::LEU2 ecm11::clonNAT*

TBR5756 TBR2065 but homozygous *CTF19-13myc::KAN ndt80::LEU2 spo11::ADE2 gmc2::cloNAT*

TBR6140 TBR2065 but homozygous *CTF19-13myc::KAN spo11::ADE2 ndt80::LEU2 zip1::LEU2*

TBR7302 TBR2065 but homozygous *CTF19-13myc::KAN spo11::ADE2 ECM11-3FLAG-KAN*

TBR5631 TBR2065 but homozygous *ecm11\_K5N-13myc-KAN*

TBR5507 TBR2065 but homozygous *ecm11\_K101N-13myc-KAN*

TBR5504 TBR2065 but homozygous *ecm11\_K5N\_K101N-13myc-KAN*

TBR5913 TBR2065 but homozygous *3myc-GMC2 zip3::URA3*

TBR5998 TBR2065 but homozygous *3myc-GMC2 zip4::URA3*

---

<sup>a</sup>One of chromosome III is circular [42]. All the strains except TBR5773 and PJ69-4A are isogenic with BR1919-8B [39]. TBR5773 is SK1 strain [41]. PJ69-4A was described previously [40].
